# Supplementary material for: An in vitro method for nephrotoxicity evaluation using HK-2 human kidney epithelial cells combined with biomarkers of nephrotoxicity
Source: Royal Society of Chemistry journal article supplement (doi:10.1039/c8tx00095f), 2018-01-01
Supplement: c8tx00095f1.pdf [file c8tx00095f1.pdf]

The HK-2 cells were treated with different concentrations of drugs (cisplatin: 2, 4  $\mu$ M; cyclosporin: 4, 8  $\mu$ M; aristolochic acid I: 8, 16  $\mu$ M; gentamicin: 4, 8 mM) for 6, 24 and 48 h. While no significant difference of albumin,  $\alpha$ 1-MG, calbindin, Collagen IV, osteoactivin and renin were found in drug treatment groups compared to the vehicle control group (Fig. S1 and S2).

The HK-2 cells were treated with 22 compounds in order to determine the predictive performance of endpoints. The growth inhibition of HK-2 cells induced by 22 compounds was shown in Table. S1. The highest protein levels of KIM-1, osteopontin, clusterin, CysC, NGAL, GST $\pi$ , TIMP-1, LDH and GGT, the lowest level of cell viability were determined (Fig. S3, S4 and S5).

Table. S1 The cell viability (%) of HK-2 cells induced by 22 compounds.

| No. | Compound             | Concentration (μM) |             |             |             |             |             |
|-----|----------------------|--------------------|-------------|-------------|-------------|-------------|-------------|
|     |                      | 0.01               | 0.1         | 1           | 10          | 100         | 1000        |
| 1   | Cisplatin            | 99.4               | 94.3        | <b>90.5</b> | <b>50.3</b> | <b>18.3</b> | 5.9         |
| 2   | Cyclosporin          | 98.2               | 97.2        | <b>95.3</b> | <b>96.4</b> | <b>67.4</b> | 15.3        |
| 3   | Aristolochic acid I  | 99.3               | 98.1        | <b>97.2</b> | <b>86.1</b> | <b>79.3</b> | 30.7        |
| 4   | Triptolide           | <b>96.3</b>        | <b>80.4</b> | <b>60.3</b> | 40.2        | 25.2        | 10.2        |
| 5   | Rifampicin           | <b>95.2</b>        | <b>83.4</b> | <b>65.2</b> | 46.2        | 20.3        | 9.4         |
| 6   | 5-Fluorouracil       | <b>93.2</b>        | <b>84.9</b> | <b>59.3</b> | 48.5        | 29.3        | 12.7        |
| 8   | Tetracycline         | <b>92.1</b>        | <b>78.3</b> | <b>52.8</b> | 36.6        | 20.1        | 8.2         |
| 9   | Ifosfamide           | 98.4               | 97.3        | <b>95.3</b> | <b>85.4</b> | <b>60.3</b> | 40.3        |
| 10  | Potassium dichromate | <b>93.7</b>        | <b>81.9</b> | <b>64.8</b> | 50.2        | 32.1        | 12.4        |
| 11  | Tobramycin           | 99.4               | 94.8        | <b>96.5</b> | <b>88.2</b> | <b>65.2</b> | 46.2        |
| 12  | Cadmium(II) chloride | <b>95.8</b>        | <b>86.4</b> | <b>69.3</b> | 30.2        | 18.5        | 5.8         |
| 13  | Ibuprofen            | 99.8               | 97.2        | <b>96.3</b> | <b>86.2</b> | <b>67.1</b> | 34.9        |
| 14  | Furosemide           | 99.7               | 97.0        | <b>95.8</b> | <b>83.8</b> | <b>62.7</b> | 30.5        |
| 15  | Cyclophosphamide     | 99.1               | 98.4        | 97.1        | <b>97.3</b> | <b>88.2</b> | <b>68.3</b> |
| 16  | Azathioprine         | 99.8               | 98.3        | <b>97.4</b> | <b>90.3</b> | <b>52.4</b> | 21.2        |
| 18  | Vancomycin           | 99.9               | 98.4        | 96.5        | <b>94.3</b> | <b>86.2</b> | <b>67.3</b> |
| 19  | Ciprofloxacin        | 99.8               | 99.2        | 97.8        | <b>95.7</b> | <b>85.8</b> | <b>64.6</b> |
| 20  | Doxorubicin          | <b>95.6</b>        | <b>96.8</b> | <b>64.7</b> | 40.2        | 20.7        | 10.5        |
| 21  | Levodopa             | 99.6               | 97.4        | 95.2        | <b>94.2</b> | <b>90.9</b> | <b>87.2</b> |
| 22  | Acarbose             | 99.8               | 99.1        | 98.3        | <b>96.1</b> | <b>92.1</b> | <b>86.6</b> |

Table. S1 The cell viability (%) of HK-2 cells induced by 22 compounds (continued).

| No. | Compound      | Concentration (μM) |      |      |             |             |             |
|-----|---------------|--------------------|------|------|-------------|-------------|-------------|
|     |               | 1                  | 10   | 100  | 1000        | 10000       | 20000       |
| 7   | Gentamicin    | 99.1               | 98.4 | 97.1 | <b>95.3</b> | <b>75.9</b> | <b>60.1</b> |
| 17  | Acetaminophen | 99.3               | 97.1 | 96.3 | <b>92.1</b> | <b>81.1</b> | <b>54.3</b> |

Note: The concentrations of the bold cell viability were chosen for the predictive performance of biomarkers.

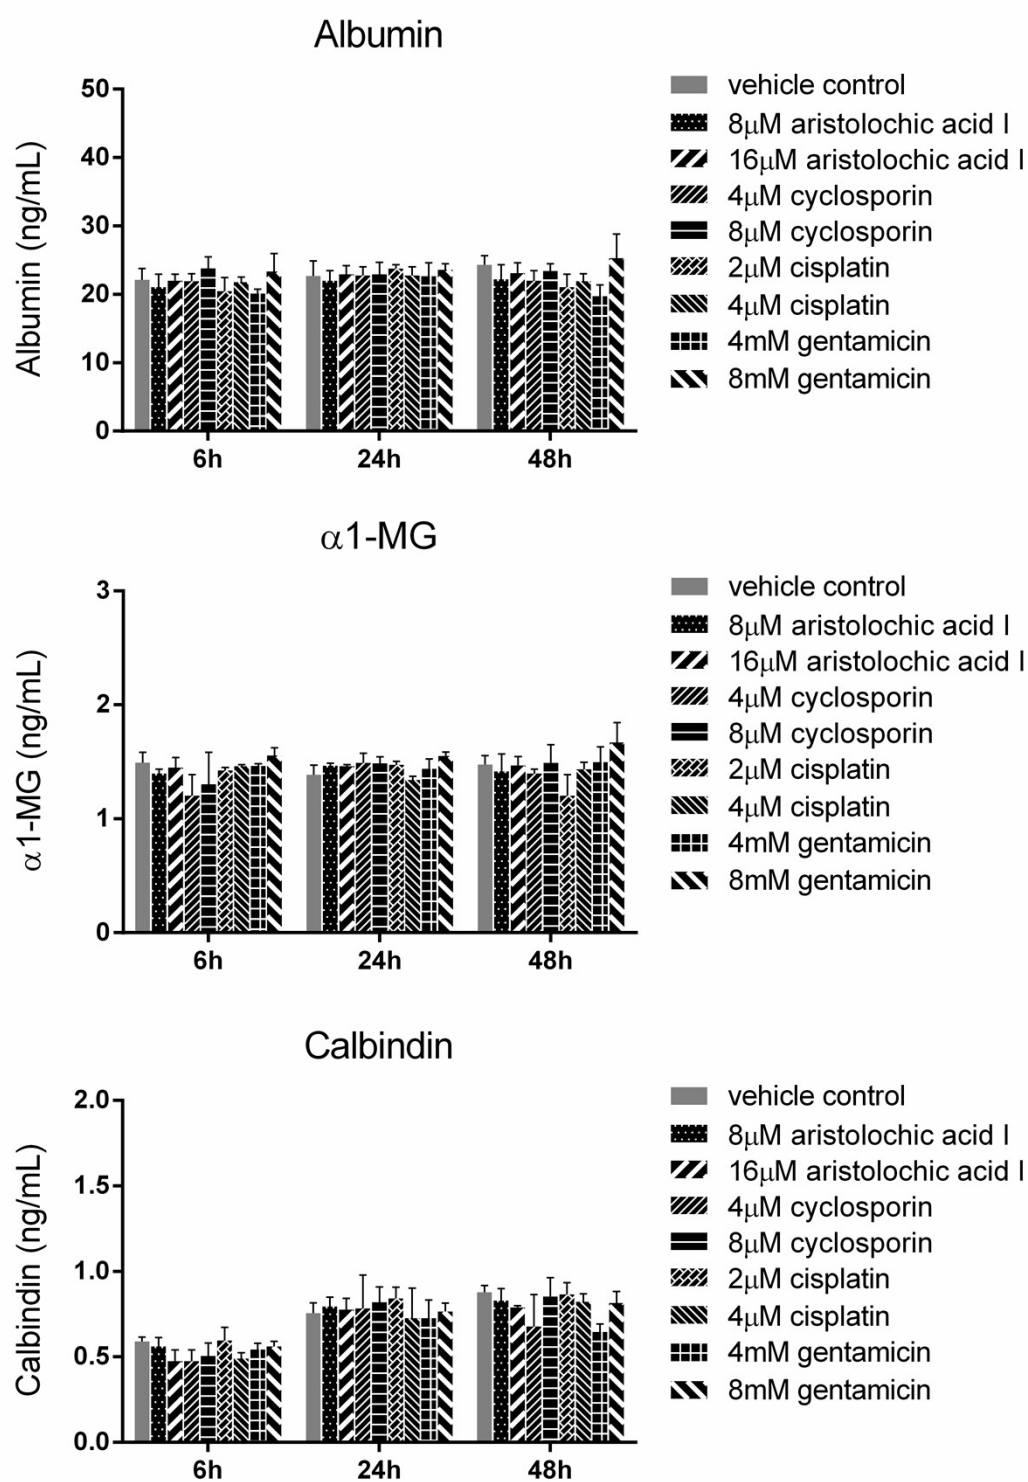

Figure S1. The protein levels of albumin,  $\alpha$ 1-MG and calbindin in HK-2 cell treated with cisplatin, cyclosporin, aristolochic acid I and gentamicin at 6, 24 and 48 h (mean  $\pm$  SD, n=3). \*Significantly different from the vehicle control value ( $p < 0.05$ ).

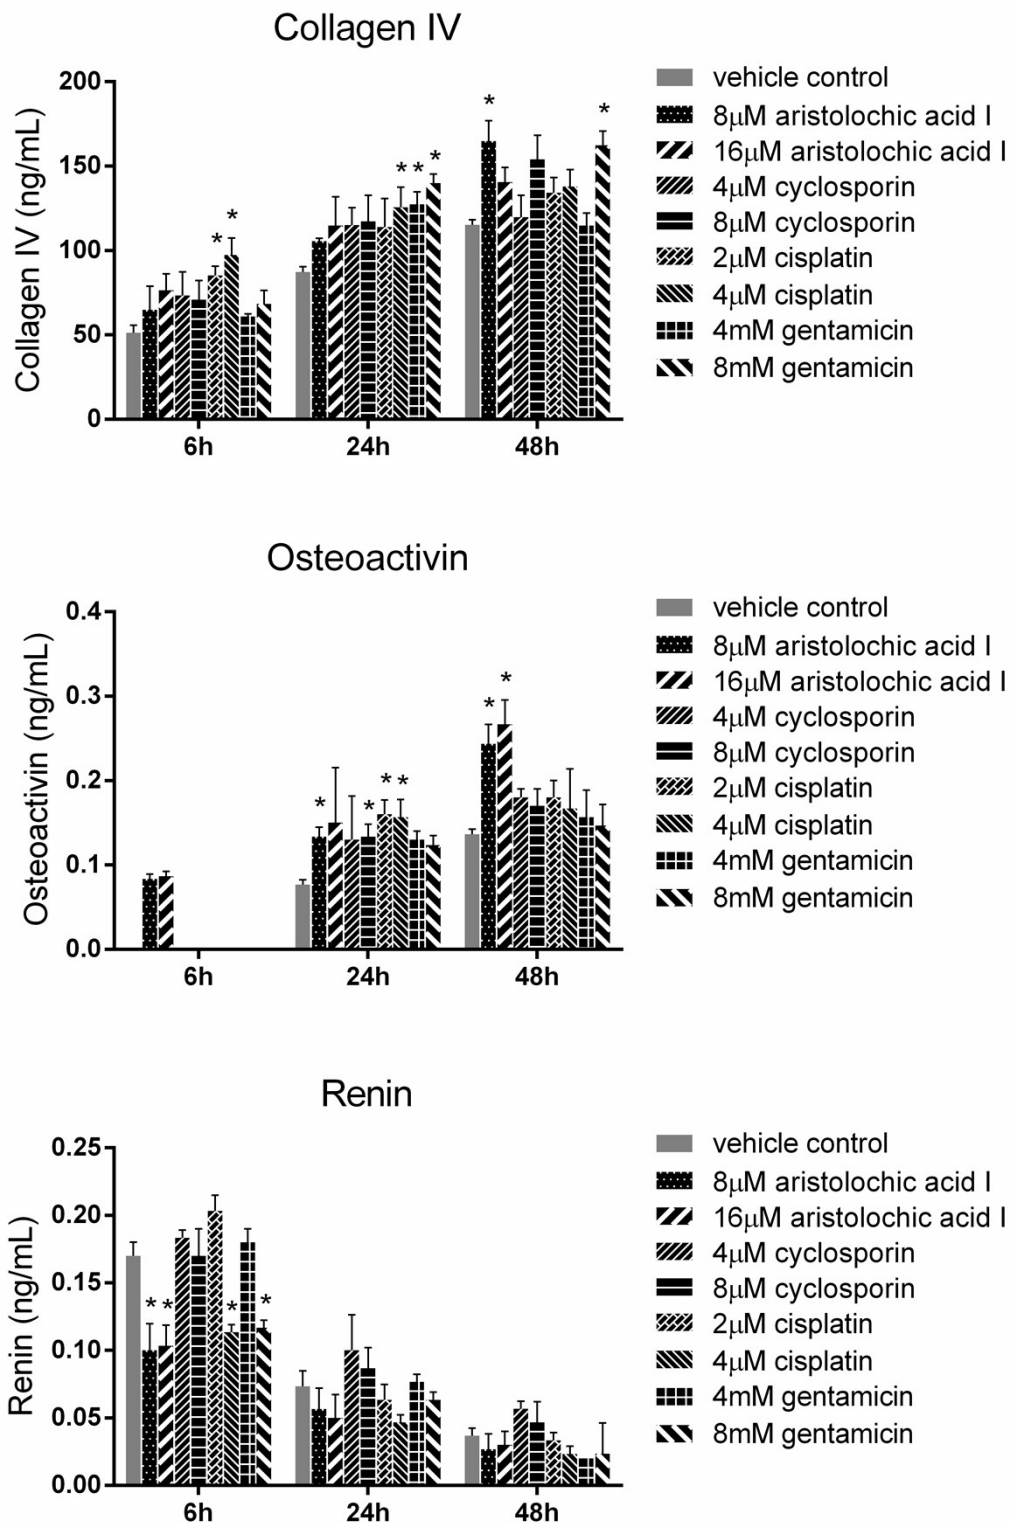

Figure S2. The protein levels of Collagen IV, osteoactivin and renin in HK-2 cell treated with cisplatin, cyclosporin, aristolochic acid I and gentamicin at 6, 24 and 48 h (mean  $\pm$  SD, n=3). \*Significantly different from the vehicle control value ( $p < 0.05$ ).

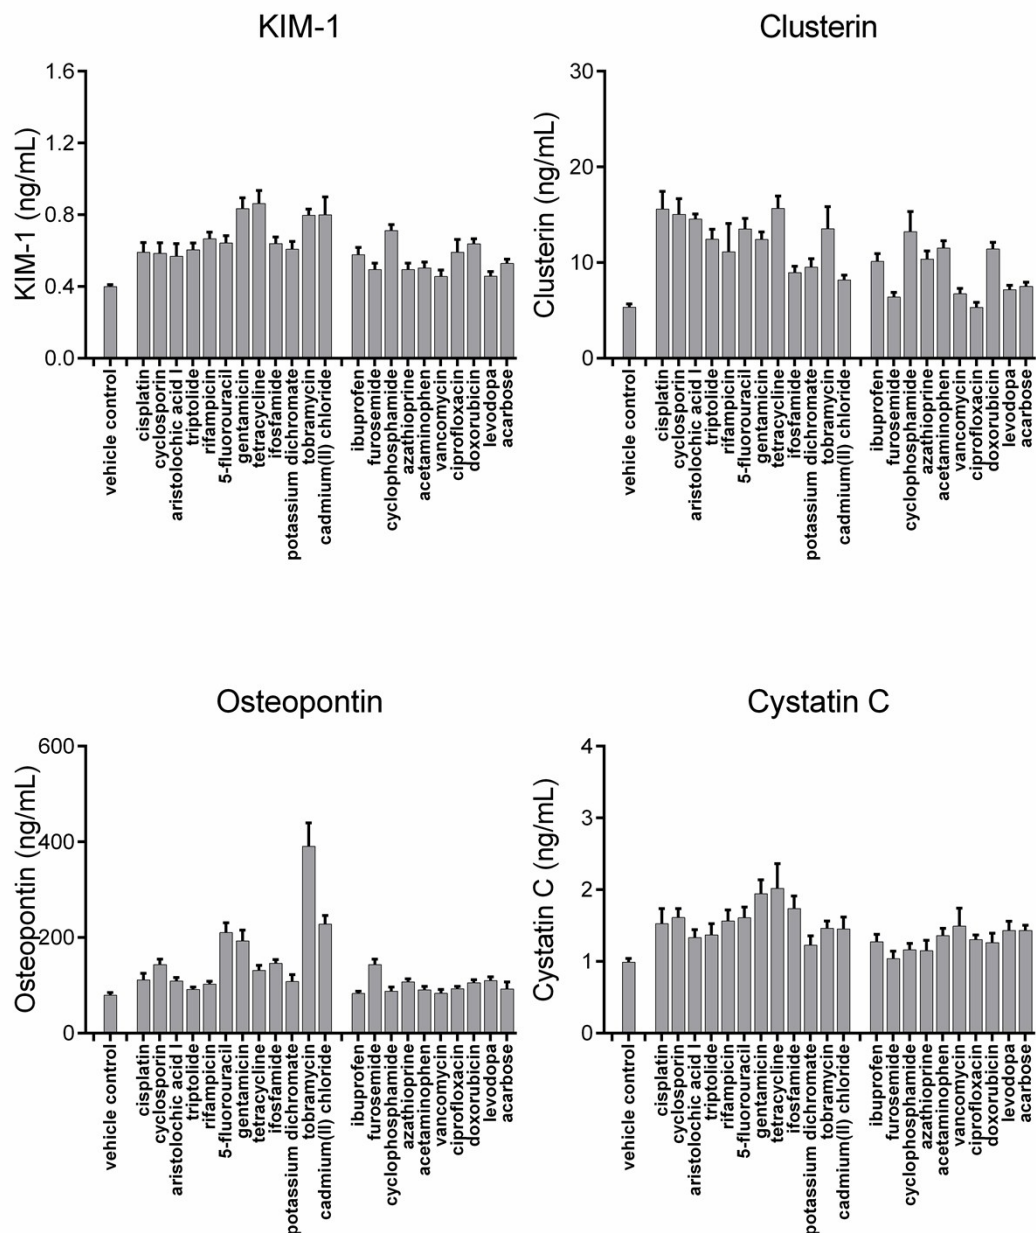

Figure S3. The highest protein levels of KIM-1, osteopontin, clusterin and CysC in the HK-2 cells treated with 22 compounds at 24 h (mean  $\pm$  SD, n=3).

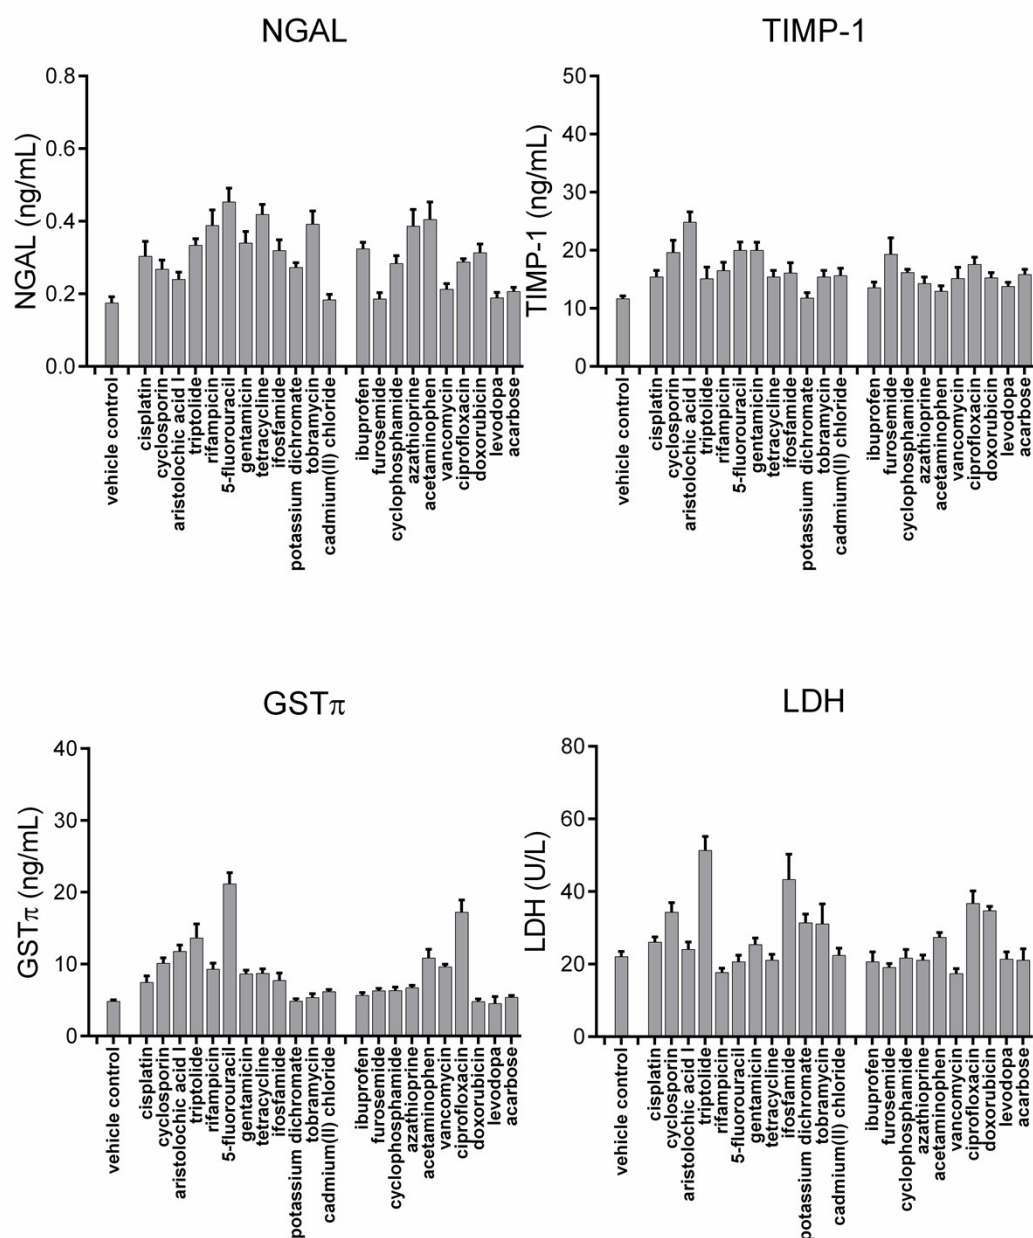

Figure S4. The highest protein levels of NGAL, TIMP-1, GSTπ and LDH in the HK-2 cells treated with 22 compounds at 24 h (mean ± SD, n=3).

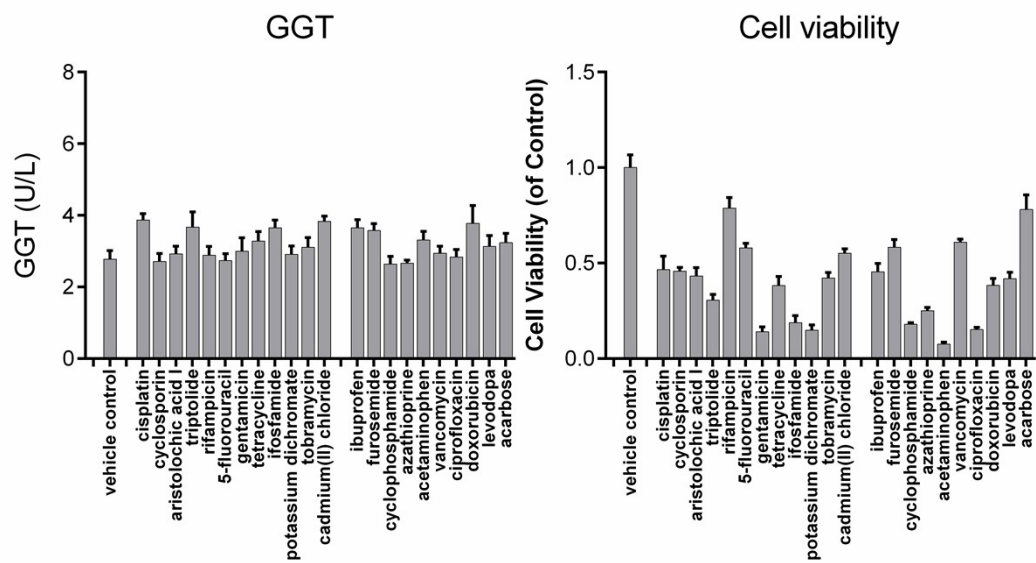

Figure S5. The highest protein levels of GGT and the lowest level of cell viability in the HK-2 cells treated with 22 compounds at 24 h (mean  $\pm$  SD, n=3).
